# Supplementary material
Source: PubMed Central journal article supplement (PMC3270960)
Supplement: supp_M111.293985_jbc.M111.293985-1.pdf [file supp_M111.293985_jbc.M111.293985-1.pdf]

## SUPPLEMENTARY MATERIAL

**FIGURE S1A.** Basal activation of VEGFR-2 and its downstream signaling. 48h after siRNA transfection, HUVECs were lysed and western blotting performed.

**FIGURE S1B.** Cell apoptosis assay. 48h after siRNA treatment, cells were analyzed by FACS to measure quantity of apoptotic cells.

All bars represent means  $\pm$  S.D. of three experiments. \*,  $p < 0.05$ .

**FIGURE S1C.** Positive control of lysosome inhibition. VEGF-A was added at 10 ng/mL with or without pepstatin at 10  $\mu$ M for 24h. HUVECs were then lysed for western-blot.

**FIGURE S1D.** Alignment of human VEGFR-2, tie-2, and VE-cadherin intronic regions containing the FOX:ETS enhancer motif.

**FIGURE. S1E.** LPAR1 mRNA level. 48h after siRNA treatment, mRNA were extracted for real-time PCR.

All bars represent means  $\pm$  S.D. of three experiments. \*,  $p < 0.05$ .

**FIGURE. S1F.** LPA dose response. LPA was added at different doses to siRNA treated HUVECs for 40h. Cells were lysed for western-blot.

**FIGURE. S2.** VE-cadherin presence on endothelial cell membranes affected. 48h after siRNA treatment, HUVECs were immunostained by anti-VE-cadherin antibody (green).

**TABLE S1:** Real-time PCR primer sequences for ChIP assay

|         | VEGFR-2 primer sequence    |
|---------|----------------------------|
| Forward | CTGGGAATTTACTTTTCACCATTCTC |
| Reverse | AAGACCTTGAAGTTGGCAATG      |

## MOVIES

siRNA-transfected HUVECs were starved overnight, then seeded onto solidified Matrigel. VEGF-A<sup>165</sup> was then added into the culture medium. Tube formation was followed for 8 h. Movie images were photographed every 15 minutes over 8 hours by an Axiovert 200M microscope with Apotome Module (Carl Zeiss) and analyzed by Axiovision 4.8 software.

**MOVIE 1** shows endothelial cell tube formation in control siRNA-transfected (48 h) HUVECs in the absence of VEGF-A.

**MOVIE 2** shows endothelial cell tube formation in VEGF-A siRNA-transfected HUVECs in the absence of VEGF-A.

**MOVIE 3** shows endothelial cell tube formation in VEGF-A siRNA transfected into HUVECs in the presence of VEGF-A at 10 ng/mL.
