# Supplementary material
Source: PubMed Central journal article supplement (PMC3270960)

## Supplemental Figure 1A

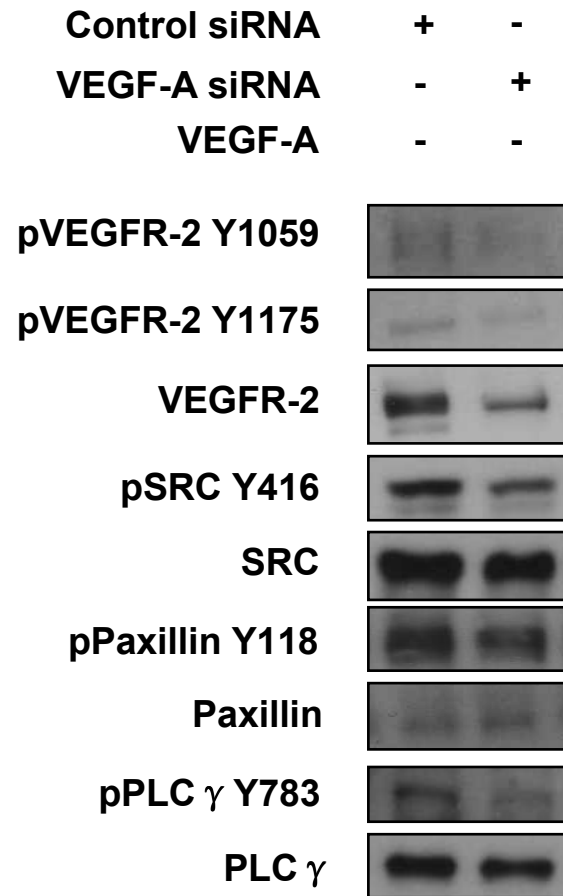

## Supplemental Figure 1B

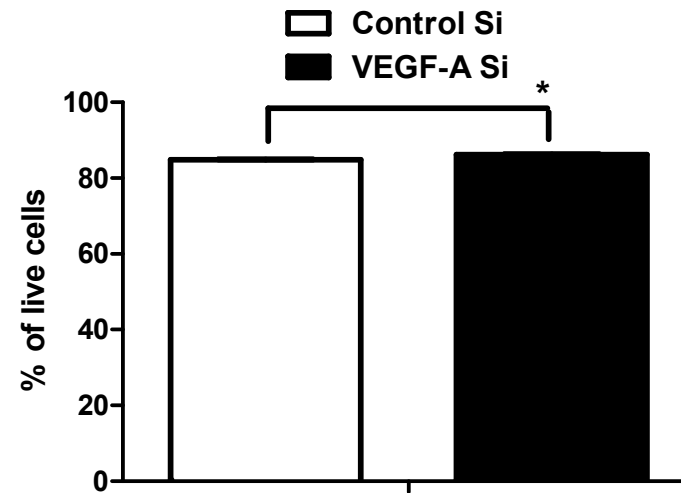

## Supplemental Figure 1C

|                          |   |   |   |
|--------------------------|---|---|---|
| VEGF-A 10 ng/mL 24h      | - | + | + |
| Pepstatin 10 $\mu$ M 24h | - | - | + |

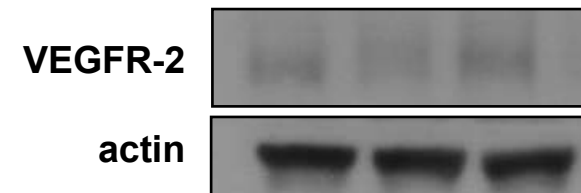

## Supplemental Figure 1D

**VEGFR-2:** TGTCATAACAGGAAGAA  
 chr4:55,828.453-55,828.469  
**VE-cadherin:** AACATAACAGGAAACC  
 chr16:64,957.955-64,957.971  
**Tie-2:** AAAGGAAACAGGAAAAA  
 chr9:27,099.374-27,099.390  
 FOX-NC motif  
 ETS-A motif  


---

**FOX:ETS motif**

## Supplemental Figure 1E

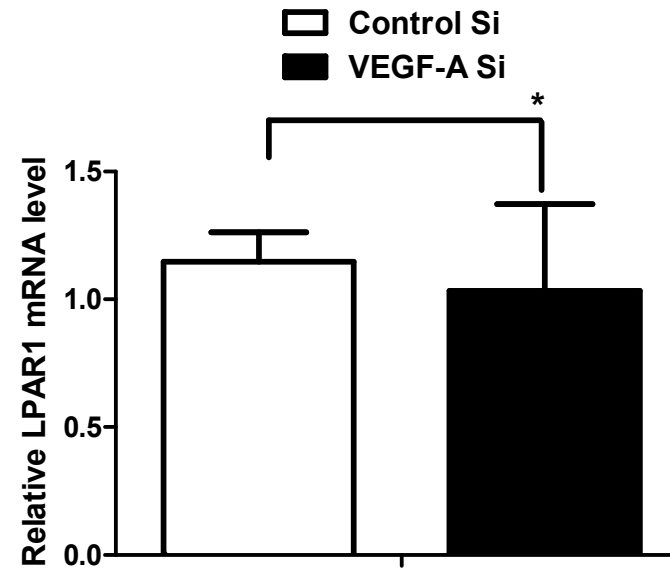

## Supplemental Figure 1F

| LPA in $\mu$ M | 0 | 0 | 1 | 1 | 2 | 2 | 4 | 4 | 5 | 5 |
|----------------|---|---|---|---|---|---|---|---|---|---|
| Control siRNA  | + | - | + | - | + | - | + | - | + | - |
| VEGF-A siRNA   | - | + | - | + | - | + | - | + | - | + |

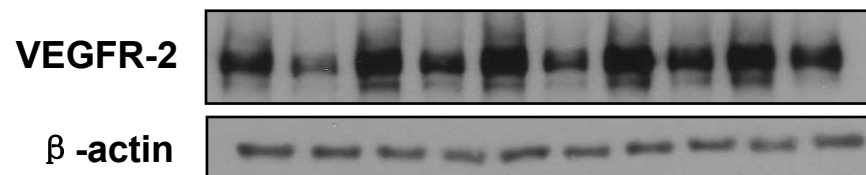

## Supplemental Figure 2

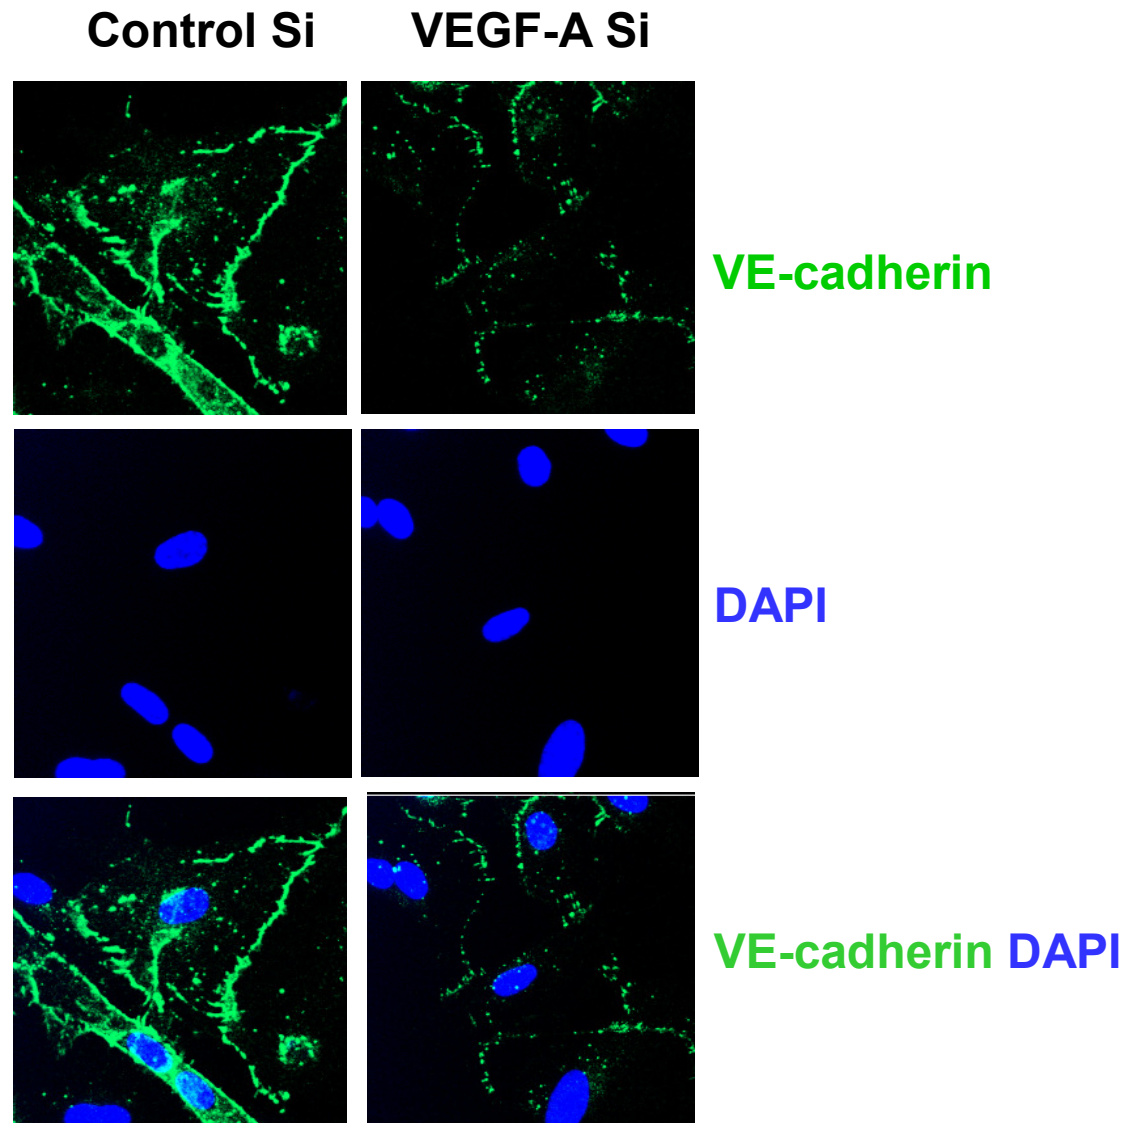

Supplement: supp_M111.293985_jbc.M111.293985-2.pdf [file supp_M111.293985_jbc.M111.293985-2.pdf]
